# Supplementary material for: Vegetative phase change is mediated by a leaf-derived signal that represses the transcription of miR156
Source: Oxford University Press journal article supplement (doi:10.1242/dev.058578), 2010-12-10
Supplement: dev058578tables1.pdf [file dev058578tables1.pdf]

**Table S1. PCR primers**

| Primer       | Sequence (5' to 3')                       |
|--------------|-------------------------------------------|
| SPL9-cacc-F  | CACCATCACATTTGAGCGTCCAAAGATATGGTCTCTGC    |
| SPL9-R       | GAGAGACCAGTTGGTATGGTGAGAAG                |
| SPL9r-1      | AGAGAGTAGTGACAGTGCGCAGTTTGAGTCGCCAATTCCTC |
| SPL9r-2      | TGCGCACTGTCTACTCTCTAATCCACATCAACCACATGA   |
| GUSp-SPL3-R1 | CATGGACCTGATAGCGGGCGTTGCTAGCGTCTTGTAGCCGA |
| GUSp-SPL3-F1 | ATGGTAGATCTGAGGGTAAATTTCTAGTTTTCTCCTTCA   |
| GUSP-SPL3-R3 | TTTACCCTCAGATCTACCATCTGCAAATTCAACTCTCTC   |
| GUSP-SPL3-F2 | AACGCCGCTATCAGGTCCATGATGAGTATGAGAAGAAGCAA |
| SPL3-G1      | CCGGAATTCCTGTAAAGATAATTGTG                |
| SPL3-G2      | GGCCGGATCCGATTAGTCTTCCAATC                |
| qMIR156A-F   | CATCTTGTAGATCTCTGAAGTTGGACT               |
| qMIR156A-R   | GAGATTGAGACATAGAGAACGAAGACA               |
| q156B-F2     | GAAGAGGGAGAGATGGTGATTG                    |
| q156B-R2     | GCAGAGATAGGCAACTGACAG                     |
| qMIR156C-F   | AAGAGAAACGCATAGAACTGACAG                  |
| qMIR156C-R   | GGGACCGAATCGGAGCCGGAATCTGAC               |
| qMIR156H-F   | GAAAGAGAGCACAACCTGGGATTAGC                |
| qMIR156H-R   | CGCAATGATGGTGGCAGAAGGAAAGAG               |
