# Supplementary figures and images for: Vegetative phase change is mediated by a leaf-derived signal that represses the transcription of miR156
Source: Oxford University Press journal article supplement (doi:10.1242/dev.058578), 2010-12-10

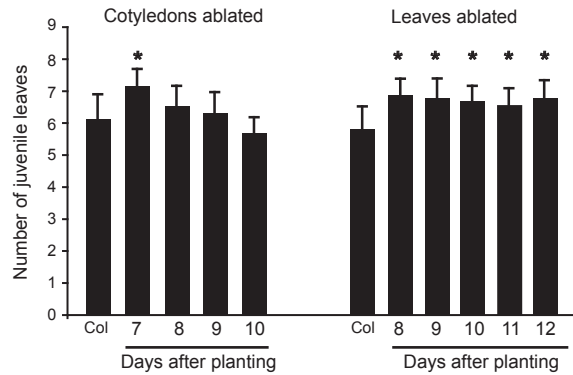

Supplement: dev058578figs1.pdf [file dev058578figs1.pdf]

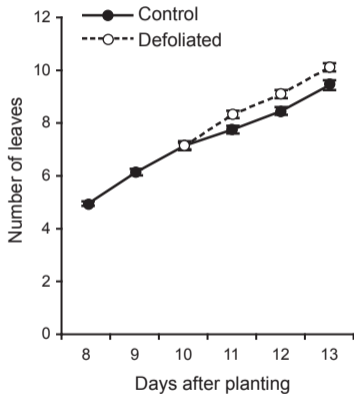

Supplement: dev058578figs2.pdf [file dev058578figs2.pdf]
